# Supplementary material for: Lanthanide separation using size-selective crystallization of Ln-MOFs
Source: Royal Society of Chemistry journal article supplement (doi:10.1039/c7cc01898c), 2017-01-01
Supplement: c7cc01898c1.pdf [file c7cc01898c1.pdf]

## Lanthanide separation using size-selective crystallization of Ln-MOFs

Heng Ya Gao, Wen Li Peng, Pan Pan Meng, Xue Feng Feng, Jian Qiang Li, Hui Qiong Wu, Chang Sheng Yan, Yang Yang Xiong, and Feng Luo\*

### Experimental details:

**Materials and general methods.** Reagents and solvents were commercially available (Alfa) and used without further purification. X-ray powder diffraction was collected by a Bruker AXS D8 Discover powder diffractometer at 40 kV, 40 mA for Cu K $\alpha$ , ( $\lambda = 1.5406\text{\AA}$ ). The simulated powder patterns were calculated by Mercury 1.4. The purity of the bulk products were determined by comparison of the simulated and experimental XRD patterns. Thermogravimetric analysis (TGA) was performed by a TGA Q500 thermal analysis system. All TGA experiments were performed under a N<sub>2</sub> atmosphere from 40-800°C at a rate of 5°C /min. EDS measurements were prepared by using an Oxford x-max microscope.

**X-ray Crystallography.** Unit cell measurements and intensity data were collected at room temperature on a Bruker-AXS SMART Breeze CCD diffractometer using graphite monochromated MoK $\alpha$  radiation ( $\lambda=0.71073\text{ \AA}$ ). The data reduction included a correction for Lorentz and polarization effects, with an applied multi-scan absorption correction (SADABS). The crystal structure was solved and refined using the SHELXTL program suite. Direct methods yielded all non-hydrogen atoms, which were refined with anisotropic thermal parameters. All hydrogen atom positions were calculated geometrically and were riding on their respective atoms.

### Synthesis.

**Synthesis of compound La<sub>2</sub>(OLZ)(H<sub>2</sub>OLZ)(DMF)(H<sub>2</sub>O)<sub>2</sub>·2H<sub>2</sub>O:** A mixture of La(NO<sub>3</sub>)<sub>3</sub> (0.1 mmol), Na<sub>2</sub>H<sub>2</sub>OLZ (0.15 mmol), DMF (5mL) and H<sub>2</sub>O (10 mL) was placed in a closed 25 ml Teflon reactor and heated at 115°C for 4320 min, and cooled to room temperature. Light yellow needle crystals were obtained with 53.8% yield based on La.

**Synthesis of compound Ce<sub>2</sub>(OLZ)(H<sub>2</sub>OLZ)(DMF)(H<sub>2</sub>O)<sub>2</sub>·2H<sub>2</sub>O:** A mixture of Ce(NO<sub>3</sub>)<sub>3</sub> (0.1 mmol), Na<sub>2</sub>H<sub>2</sub>OLZ (0.15 mmol), DMF (5 mL) and H<sub>2</sub>O (10 mL) was placed in a closed 25 ml Teflon reactor and heated at 115°C for 4320 min, and cooled to room temperature. Yellow needle crystals were obtained with 61.2% yield based on Ce.

**Synthesis of compound Pr<sub>2</sub>(OLZ)(H<sub>2</sub>OLZ)(DMF)(H<sub>2</sub>O)<sub>2</sub>·2H<sub>2</sub>O:** A mixture of Pr(NO<sub>3</sub>)<sub>3</sub> (0.1 mmol), Na<sub>2</sub>H<sub>2</sub>OLZ (0.15 mmol), DMF (5 mL) and H<sub>2</sub>O (10 mL) was placed in a closed 25 ml

Teflon reactor and heated at 115°C for 4320 min, and cooled to room temperature. Yellow strip crystals were obtained with 59.0% yield based on Pr.

**Synthesis of compound  $\text{Nd}(\text{OLZ})_{0.5}(\text{H}_2\text{OLZ})_{0.5}(\text{DMF})(\mu_2\text{-DMF})_{0.5}$ :** A mixture of  $\text{Nd}(\text{NO}_3)_3$  (0.1 mmol),  $\text{Na}_2\text{H}_2\text{OLZ}$  (0.15 mmol), DMF (5 mL) and  $\text{H}_2\text{O}$  (10 mL) was placed in a closed 25 ml Teflon reactor and heated at 115°C for 4320 min, and cooled to room temperature. Long strip crystals were obtained with 53.0% yield based on Nd.

**Synthesis of compound  $\text{Sm}(\text{OLZ})_{0.5}(\text{H}_2\text{OLZ})_{0.5}(\text{DMF})(\mu_2\text{-DMF})_{0.5}$ :** A mixture of  $\text{Sm}(\text{NO}_3)_3$  (0.1 mmol),  $\text{Na}_2\text{H}_2\text{OLZ}$  (0.15 mmol), DMF (5 mL) and  $\text{H}_2\text{O}$  (10 mL) was placed in a closed 25 ml Teflon reactor and heated at 115°C for 4320 min, and cooled to room temperature. The yellow stripe crystals were obtained with 57.4% yield based on Sm.

**Synthesis of compound  $\text{Eu}(\text{OLZ})_{0.5}(\text{H}_2\text{OLZ})_{0.5}(\text{DMF})(\mu_2\text{-DMF})_{0.5}$ :** A mixture of  $\text{Eu}(\text{NO}_3)_3$  (0.1 mmol),  $\text{Na}_2\text{H}_2\text{OLZ}$  (0.15 mmol), DMF (5 mL) and  $\text{H}_2\text{O}$  (10 mL) was placed in a closed 25 ml Teflon reactor and heated at 115°C for 4320 min, and cooled to room temperature. Acicular crystals were obtained with 54.1% yield based on Eu.

**Synthesis of compound  $\text{Gd}(\text{OLZ})_{0.5}(\text{H}_2\text{OLZ})_{0.5}(\text{DMF})(\text{H}_2\text{O})\cdot\text{H}_2\text{O}$ :** A mixture of  $\text{Gd}(\text{NO}_3)_3$  (0.1 mmol),  $\text{Na}_2\text{H}_2\text{OLZ}$  (0.15 mmol), DMF (5 mL) and  $\text{H}_2\text{O}$  (10 mL) was placed in a closed 25 ml Teflon reactor and heated at 115°C for 4320 min, and cooled to room temperature. The yellow block crystals were obtained with 61.0% yield based on Gd.

**Synthesis of compound  $\text{Tb}(\text{OLZ})_{0.5}(\text{H}_2\text{OLZ})_{0.5}(\text{DMF})(\text{H}_2\text{O})\cdot\text{H}_2\text{O}$ :** A mixture of  $\text{Tb}(\text{NO}_3)_3$  (0.1 mmol),  $\text{Na}_2\text{H}_2\text{OLZ}$  (0.15 mmol), DMF (5 mL) and  $\text{H}_2\text{O}$  (10 mL) was placed in a closed 25 ml Teflon reactor and heated at 115°C for 4320 min, and cooled to room temperature. The yellow strip crystals were obtained with 63.3% yield based on Tb.

**Synthesis of compound  $\text{Dy}(\text{OLZ})_{0.5}(\text{H}_2\text{OLZ})_{0.5}(\text{DMF})(\text{H}_2\text{O})\cdot\text{H}_2\text{O}$ :** A mixture of  $\text{Dy}(\text{NO}_3)_3$  (0.1 mmol),  $\text{Na}_2\text{H}_2\text{OLZ}$  (0.15 mmol), DMF (5 mL) and  $\text{H}_2\text{O}$  (10 mL) was placed in a closed 25 ml Teflon reactor and heated at 115°C for 4320 min, and cooled to room temperature. The yellow strip crystals were obtained with 66.7% yield based on Dy.

**Synthesis of compound  $\text{Ho}(\text{OLZ})_{0.5}(\text{H}_2\text{OLZ})_{0.5}(\text{DMF})(\text{H}_2\text{O})\cdot\text{H}_2\text{O}$ :** A mixture of  $\text{Ho}(\text{NO}_3)_3$  (0.1 mmol),  $\text{Na}_2\text{H}_2\text{OLZ}$  (0.15 mmol), DMF (5 mL) and  $\text{H}_2\text{O}$  (10 mL) was placed in a closed 25 ml

Teflon reactor and heated at 115°C for 4320 min, and cooled to room temperature. The yellow crystals were obtained with 65.8% yield based on Ho.

**Synthesis of compound  $\text{Er}_2(\text{OLZ})(\text{H}_2\text{OLZ})(\text{H}_2\text{O})_4$ :** A mixture of  $\text{Er}(\text{NO}_3)_3$  (0.1 mmol),  $\text{Na}_2\text{H}_2\text{OLZ}$  (0.15 mmol), DMF (5 mL) and  $\text{H}_2\text{O}$  (10 mL) was placed in a closed 25 ml Teflon reactor and heated at 115°C for 4320 min, and cooled to room temperature. The yellow crystals were obtained with 55.9% yield based on Er.

**Synthesis of compound  $\text{Tm}_2(\text{OLZ})(\text{H}_2\text{OLZ})(\text{H}_2\text{O})_4$ :** A mixture of  $\text{Tm}(\text{NO}_3)_3$  (0.1 mmol),  $\text{Na}_2\text{H}_2\text{OLZ}$  (0.15 mmol), DMF (5 mL) and  $\text{H}_2\text{O}$  (10 mL) was placed in a closed 25 ml Teflon reactor and heated at 115°C for 4320 min, and cooled to room temperature. The yellow crystals were obtained with 58.8% yield based on Tm.

**Synthesis of compound  $\text{Lu}_2(\text{OLZ})(\text{H}_2\text{OLZ})(\text{H}_2\text{O})_4$ :** A mixture of  $\text{Lu}(\text{NO}_3)_3$  (0.1 mmol),  $\text{Na}_2\text{H}_2\text{OLZ}$  (0.15 mmol), DMF (5 mL) and  $\text{H}_2\text{O}$  (10 mL) was placed in a closed 25 ml Teflon reactor and heated at 115°C for 4320 min, and cooled to room temperature. The yellow crystals were obtained with 56.2% yield based on Lu.

### **Mixed modes:**

**For example, type I plus type II:** A mixture of  $\text{La}(\text{NO}_3)_3$  (0.05 mmol),  $\text{Nd}(\text{NO}_3)_3$  (0.05 mmol),  $\text{Na}_2\text{H}_2\text{OLZ}$  (0.09 mmol), DMF (5 mL) and  $\text{H}_2\text{O}$  (10 mL) was placed in a closed 25 ml Teflon reactor and heated at 115°C for 4320 min, and cooled to room temperature.

**For example, type II plus type III:** A mixture of  $\text{Nd}(\text{NO}_3)_3$  (0.05 mmol),  $\text{Dy}(\text{NO}_3)_3$  (0.05 mmol),  $\text{Na}_2\text{H}_2\text{OLZ}$  (0.09 mmol), DMF (5 mL) and  $\text{H}_2\text{O}$  (10 mL) was placed in a closed 25 ml Teflon reactor and heated at 115°C for 4320 min, and cooled to room temperature.

**For example, type III plus type IV:** A mixture of  $\text{Dy}(\text{NO}_3)_3$  (0.05 mmol),  $\text{Tm}(\text{NO}_3)_3$  (0.05 mmol),  $\text{Na}_2\text{H}_2\text{OLZ}$  (0.09 mmol), DMF (5 mL) and  $\text{H}_2\text{O}$  (10 mL) was placed in a closed 25 ml Teflon reactor and heated at 115°C for 4320 min, and cooled to room temperature.

**For example, type I+type II+type III:** A mixture of  $\text{La}(\text{NO}_3)_3$  (0.03 mmol),  $\text{Nd}(\text{NO}_3)_3$  (0.03 mmol),  $\text{Dy}(\text{NO}_3)_3$  (0.03 mmol),  $\text{Na}_2\text{H}_2\text{OLZ}$  (0.05 mmol), DMF (5 mL) and  $\text{H}_2\text{O}$  (10 mL) was placed in a closed 25 ml Teflon reactor and heated at 115°C for 4320 min, and cooled to room temperature.

**For example, type II+type III+type IV:** A mixture of  $\text{Nd}(\text{NO}_3)_3$  (0.03 mmol),  $\text{Dy}(\text{NO}_3)_3$  (0.03 mmol),  $\text{Tm}(\text{NO}_3)_3$  (0.03 mmol),  $\text{Na}_2\text{H}_2\text{OLZ}$  (0.05 mmol), DMF (5 mL) and  $\text{H}_2\text{O}$  (10 mL) was placed in a closed 25 ml Teflon reactor and heated at  $115^\circ\text{C}$  for 4320 min, and cooled to room temperature.

**For example, type I+type II+type III+type IV:** A mixture of  $\text{La}(\text{NO}_3)_3$  (0.025 mmol),  $\text{Nd}(\text{NO}_3)_3$  (0.025 mmol),  $\text{Dy}(\text{NO}_3)_3$  (0.025 mmol),  $\text{Tm}(\text{NO}_3)_3$  (0.025 mmol),  $\text{Na}_2\text{H}_2\text{OLZ}$  (0.04 mmol), DMF (5 mL) and  $\text{H}_2\text{O}$  (10 mL) was placed in a closed 25 ml Teflon reactor and heated at  $115^\circ\text{C}$  for 4320 min, and cooled to room temperature.

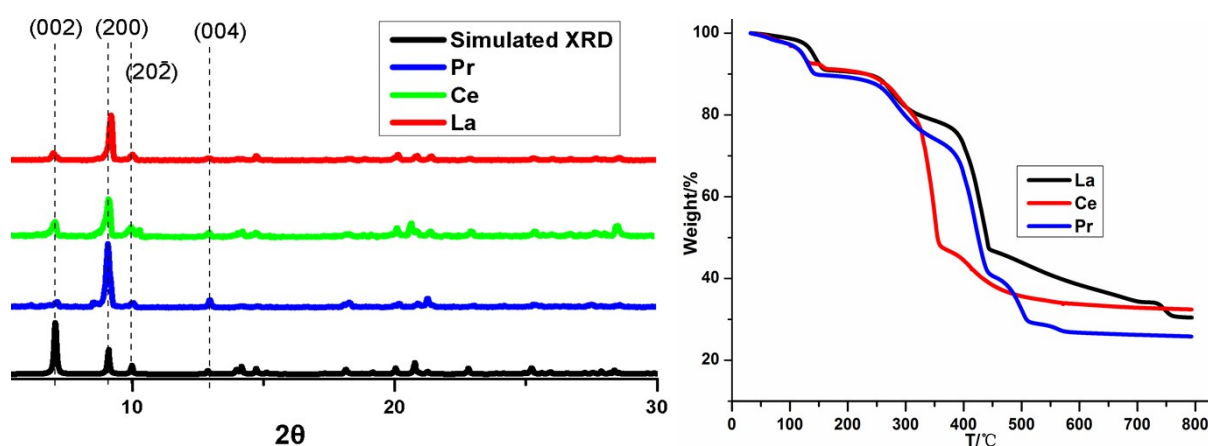

**Fig. S1** *Left:* The experimental XRD patterns of type I and the corresponding data simulated from single crystal data. *Right:* TG plots of type I, where before  $150^\circ\text{C}$  the weight loss is ascribed to free guest molecules.

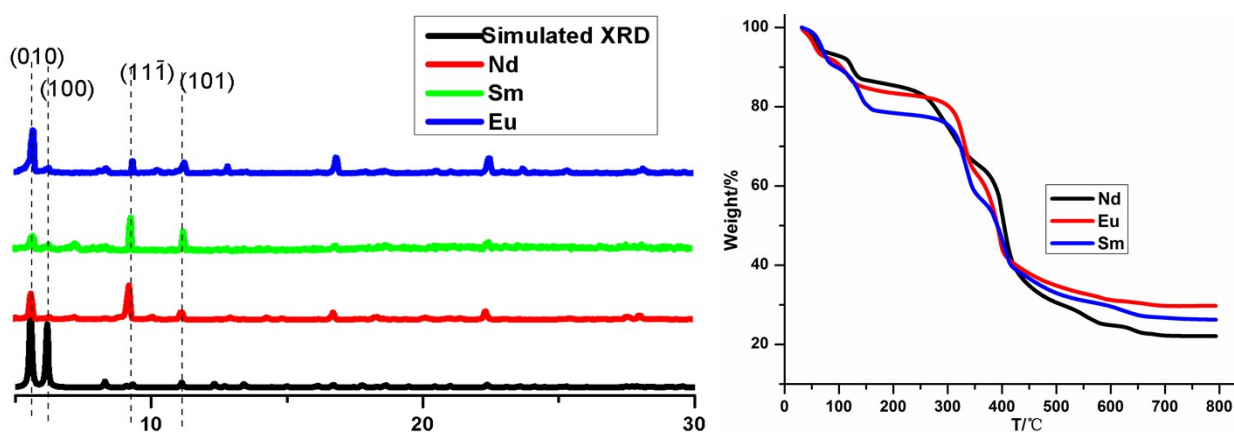

**Fig. S2** *Left:* The experimental XRD patterns of type II and the corresponding data simulated from single crystal data. *Right:* TG plots of type II, where before  $160^\circ\text{C}$  the weight loss is ascribed to free guest molecules.

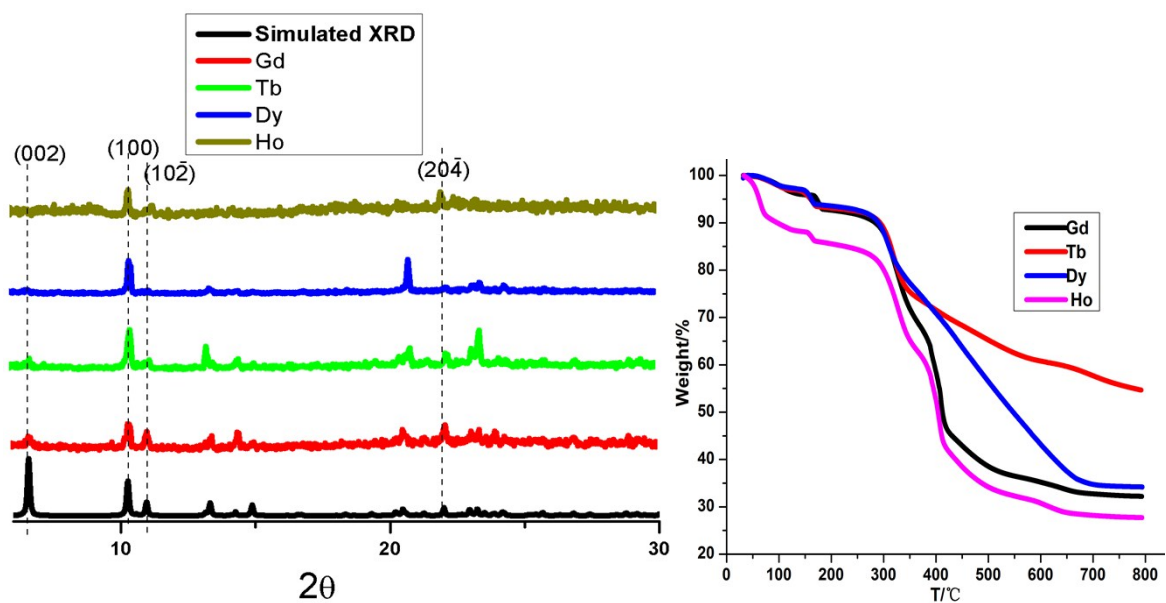

**Fig. S3** *Left:* The experimental XRD patterns of type III and the corresponding data simulated from single crystal data. *Right:* TG plots of type III, where before 170°C the weight loss is ascribed to free guest molecules. For Ho sample, its crystal is slight polluted by some unknown phase on its crystal surface, thus leading to some abnormality in both XRD and TG, relative to other Ln ions. We try to get clean Ho crystal by washing it with various solvents, however without obvious improvement.

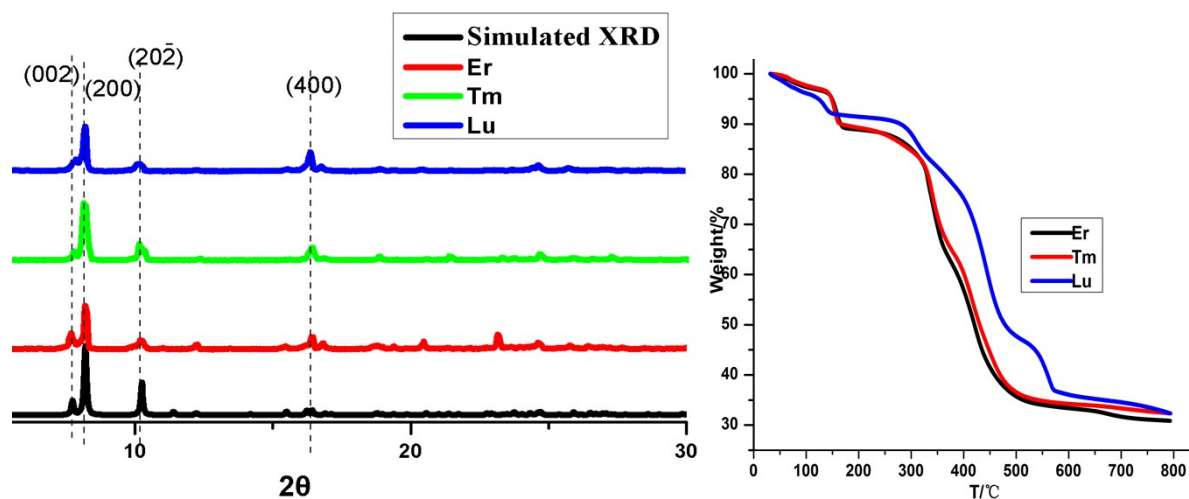

**Fig. S4** *Left:* The experimental XRD patterns of type IV and the corresponding data simulated from single crystal data. *Right:* TG plots of type IV, where before 170°C the weight loss is ascribed to free guest molecules.

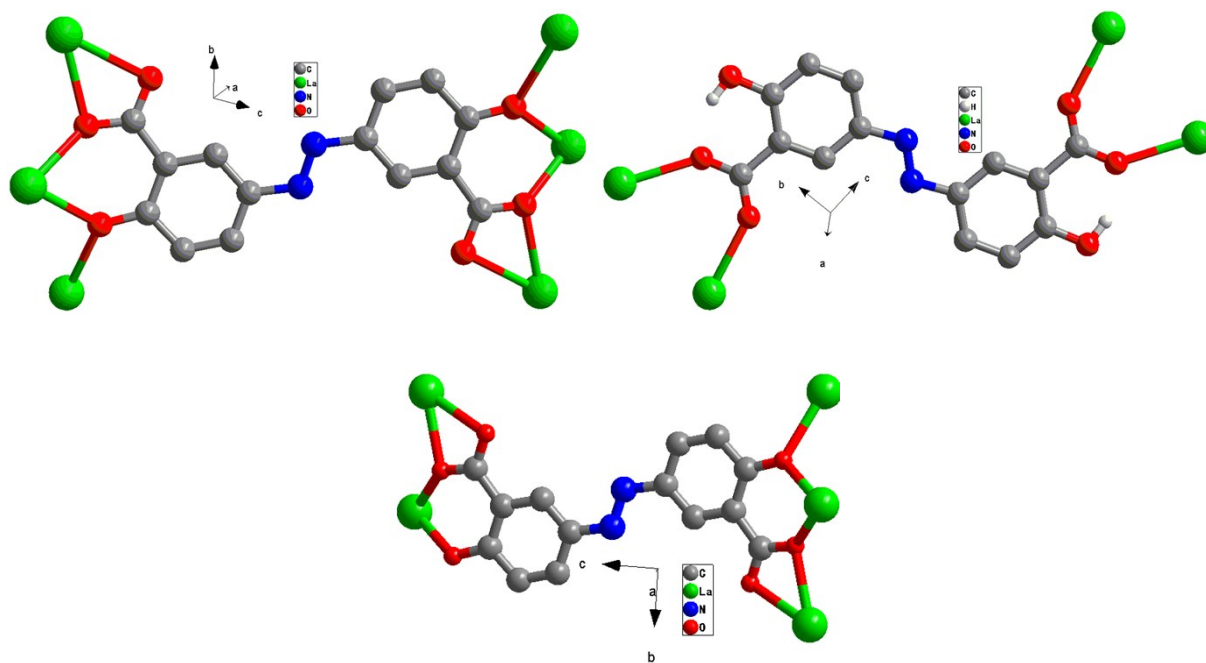

Fig. S5 The coordination models of organic ligands in this work.

Table S1. Summary of crystal data of type I.

| type I         | La                                                                                                    | Ce                                                                                                     | Pr                                                                                                    |
|----------------|-------------------------------------------------------------------------------------------------------|--------------------------------------------------------------------------------------------------------|-------------------------------------------------------------------------------------------------------|
| formula        | La <sub>2</sub> (OLZ)(H <sub>2</sub> OLZ)(DMF)<br>(H <sub>2</sub> O) <sub>2</sub> ·2 H <sub>2</sub> O | Ce <sub>2</sub> (OLZ)(H <sub>2</sub> OLZ)(DMF)<br>(H <sub>2</sub> O) <sub>2</sub> · 2 H <sub>2</sub> O | Pr <sub>2</sub> (OLZ)(H <sub>2</sub> OLZ)(DMF)<br>(H <sub>2</sub> O) <sub>2</sub> ·2 H <sub>2</sub> O |
| FW             | 1075.40                                                                                               | 1077.84                                                                                                | 1079.42                                                                                               |
| Crystal system | Monoclinic                                                                                            | Monoclinic                                                                                             | Monoclinic                                                                                            |
| space group    | C2/c                                                                                                  | C2/c                                                                                                   | C2/c                                                                                                  |
| a, Å           | 20.108(2)                                                                                             | 20.0164(6)                                                                                             | 20.0308(9)                                                                                            |
| b, Å           | 7.4444(9)                                                                                             | 7.3972(2)                                                                                              | 7.3601(3)                                                                                             |
| c, Å           | 25.868(3)                                                                                             | 25.7120(7)                                                                                             | 25.6802(12)                                                                                           |
| α, °           | 90                                                                                                    | 90                                                                                                     | 90                                                                                                    |
| β, °           | 104.940(4)                                                                                            | 105.0930(10)                                                                                           | 105.047(2)                                                                                            |
| γ, °           | 90                                                                                                    | 90                                                                                                     | 90                                                                                                    |

|                                         |                              |                              |                              |
|-----------------------------------------|------------------------------|------------------------------|------------------------------|
| V, Å <sup>3</sup>                       | 3741.5(8)                    | 3675.73(18)                  | 3656.2(3)                    |
| Z                                       | 4                            | 4                            | 4                            |
| d <sub>calcd</sub> , g cm <sup>-3</sup> | 1.900                        | 1.939                        | 1.945                        |
| Final R indices<br>[I > 2σ(I)]          | R1 = 0.0299, wR2 =<br>0.0761 | R1 = 0.0300, wR2 =<br>0.0765 | R1 = 0.0271, wR2 =<br>0.0701 |
| R indices                               | R1 = 0.0312, wR2 =<br>0.0775 | R1 = 0.0325, wR2 =<br>0.0785 | R1 = 0.0300, wR2 =<br>0.0723 |
| GOF                                     | 1.083                        | 0.979                        | 1.056                        |
| CCDC number                             | 1537206                      | 1537207                      | 1537208                      |

Table S2. Summary of crystal data of type **II**.

| type <b>II</b>    | Nd                                                                                                   | Sm                                                                                                   | Eu                                                                                                   |
|-------------------|------------------------------------------------------------------------------------------------------|------------------------------------------------------------------------------------------------------|------------------------------------------------------------------------------------------------------|
| formula           | Nd(OLZ) <sub>0.5</sub> (H <sub>2</sub> OLZ) <sub>0.5</sub> (DMF)(μ <sub>2</sub> -DMF) <sub>0.5</sub> | Sm(OLZ) <sub>0.5</sub> (H <sub>2</sub> OLZ) <sub>0.5</sub> (DMF)(μ <sub>2</sub> -DMF) <sub>0.5</sub> | Eu(OLZ) <sub>0.5</sub> (H <sub>2</sub> OLZ) <sub>0.5</sub> (DMF)(μ <sub>2</sub> -DMF) <sub>0.5</sub> |
| FW                | 553.0                                                                                                | 559.2                                                                                                | 560.8                                                                                                |
| crystal system    | Monoclinic                                                                                           | Monoclinic                                                                                           | Monoclinic                                                                                           |
| space group       | P2/c                                                                                                 | P2/c                                                                                                 | P2/c                                                                                                 |
| a, Å              | 15.528(4)                                                                                            | 15.5354(8)                                                                                           | 15.516(4)                                                                                            |
| b, Å              | 15.528(4)                                                                                            | 15.8981(10)                                                                                          | 15.899(5)                                                                                            |
| c, °              | 13.519(3)                                                                                            | 13.3111(8)                                                                                           | 13.270(4)                                                                                            |
| α, °              | 90                                                                                                   | 90                                                                                                   | 90                                                                                                   |
| β, deg            | 112.643(16)                                                                                          | 112.592(3)                                                                                           | 112.469(11)                                                                                          |
| γ, °              | 90                                                                                                   | 90                                                                                                   | 90                                                                                                   |
| V, Å <sup>3</sup> | 3099.7(13)                                                                                           | 3035.3(3)                                                                                            | 3025.1(15)                                                                                           |
| Z                 | 4                                                                                                    | 4                                                                                                    | 4                                                                                                    |

|                             |                           |                           |                           |
|-----------------------------|---------------------------|---------------------------|---------------------------|
| dcalcd., g cm <sup>-3</sup> | 1.000                     | 1.146                     | 1.230                     |
| Final R indices [I>2σ(I)]   | R1 = 0.1276, wR2 = 0.3124 | R1 = 0.0818, wR2 = 0.2122 | R1 = 0.0433, wR2 = 0.1291 |
| R indices                   | R1 = 0.1390, wR2 = 0.3178 | R1 = 0.1125, wR2 = 0.2345 | R1 = 0.0573, wR2 = 0.1417 |
| GOF                         | 1.158                     | 1.164                     | 1.063                     |
| CCDC number                 | 1537213                   | 1537215                   | 1537214                   |

Table S3. Summary of crystal data of type **III**.

| type <b>III</b>   | Gd                                                                                                  | Tb                                                                                                  | Dy                                                                                                  | Ho                                                                                                  |
|-------------------|-----------------------------------------------------------------------------------------------------|-----------------------------------------------------------------------------------------------------|-----------------------------------------------------------------------------------------------------|-----------------------------------------------------------------------------------------------------|
| formula           | Gd(OLZ) <sub>0.5</sub> (H <sub>2</sub> OLZ) <sub>0.5</sub> (DMF)(H <sub>2</sub> O)·H <sub>2</sub> O | Tb(OLZ) <sub>0.5</sub> (H <sub>2</sub> OLZ) <sub>0.5</sub> (DMF)(H <sub>2</sub> O)·H <sub>2</sub> O | Dy(OLZ) <sub>0.5</sub> (H <sub>2</sub> OLZ) <sub>0.5</sub> (DMF)(H <sub>2</sub> O)·H <sub>2</sub> O | Ho(OLZ) <sub>0.5</sub> (H <sub>2</sub> OLZ) <sub>0.5</sub> (DMF)(H <sub>2</sub> O)·H <sub>2</sub> O |
| FW                | 564.5                                                                                               | 566.2                                                                                               | 569.8                                                                                               | 572.2                                                                                               |
| crystal system    | Monoclinic                                                                                          | Monoclinic                                                                                          | Monoclinic                                                                                          | Monoclinic                                                                                          |
| space group       | P2(1)/c                                                                                             | P2(1)/c                                                                                             | P2(1)/c                                                                                             | P2(1)/c                                                                                             |
| a, Å              | 8.8181(2)                                                                                           | 8.742(2)                                                                                            | 8.7525(13)                                                                                          | 8.8304(17)                                                                                          |
| b, Å              | 8.78790(10)                                                                                         | 8.729(2)                                                                                            | 8.7492(12)                                                                                          | 8.8257(17)                                                                                          |
| c, Å              | 27.5387(4)                                                                                          | 27.415(7)                                                                                           | 27.498(4)                                                                                           | 27.644(5)                                                                                           |
| α, °              | 90                                                                                                  | 90                                                                                                  | 90                                                                                                  | 90                                                                                                  |
| β, °              | 102.1830(10)                                                                                        | 102.193(10)                                                                                         | 102.074(9)                                                                                          | 102.142(9)                                                                                          |
| γ, °              | 90                                                                                                  | 90                                                                                                  | 90                                                                                                  | 90                                                                                                  |
| V, Å <sup>3</sup> | 2085.98(6)                                                                                          | 2044.8(8)                                                                                           | 2059.1(5)                                                                                           | 2106.2(7)                                                                                           |
| Z                 | 4                                                                                                   | 4                                                                                                   | 4                                                                                                   | 4                                                                                                   |



|                                         |                              |                           |                              |                              |
|-----------------------------------------|------------------------------|---------------------------|------------------------------|------------------------------|
| dcalcd, g<br>cm <sup>-3</sup>           | 1.795                        | 1.843                     | 1.841                        | 1.808                        |
| Final R<br>indices<br>[I>2sigma(I<br>)] | R1 = 0.0178, wR2 =<br>0.0504 | R1 = 0.0228, wR2 = 0.0509 | R1 = 0.0187, wR2 =<br>0.0461 | R1 = 0.0414, wR2 =<br>0.1083 |
| R indices                               | R1 = 0.0215, wR2 =<br>0.0626 | R1 = 0.0276, wR2 = 0.0554 | R1 = 0.0223, wR2 =<br>0.0472 | R1 = 0.0425, wR2 =<br>0.1090 |
| GOF                                     | 1.253                        | 1.162                     | 1.056                        | 1.177                        |
| CCDC<br>number                          | 1537218                      | 1537219                   | 1537220                      | 1537221                      |

Table S4. Summary of crystal data of type **IV**.

| type <b>IV</b>    | Er                                                                       | Tm                                                                       | Lu                                                                       |
|-------------------|--------------------------------------------------------------------------|--------------------------------------------------------------------------|--------------------------------------------------------------------------|
| formula           | Er <sub>2</sub> (OLZ)(H <sub>2</sub> OLZ)(H <sub>2</sub> O) <sub>4</sub> | Tm <sub>2</sub> (OLZ)(H <sub>2</sub> OLZ)(H <sub>2</sub> O) <sub>4</sub> | Lu <sub>2</sub> (OLZ)(H <sub>2</sub> OLZ)(H <sub>2</sub> O) <sub>4</sub> |
| FW                | 1005.0                                                                   | 1008.3                                                                   | 1020.4                                                                   |
| crystal system    | Monoclinic                                                               | Monoclinic                                                               | Monoclinic                                                               |
| space group       | C2/c                                                                     | C2/c                                                                     | C2/c                                                                     |
| a, Å              | 21.8947(18)                                                              | 21.8947(18)                                                              | 21.617(3)                                                                |
| b, Å              | 8.3062(7)                                                                | 8.3062(7)                                                                | 8.2378(10)                                                               |
| c, Å              | 23.2034(18)                                                              | 23.2034(18)                                                              | 23.158(3)                                                                |
| α, °              | 90                                                                       | 90                                                                       | 90                                                                       |
| β, °              | 100.053(4)                                                               | 100.053(4)                                                               | 99.426(5)                                                                |
| γ, °              | 90                                                                       | 90                                                                       | 90                                                                       |
| V, Å <sup>3</sup> | 4155.0(6)                                                                | 4155.0(6)                                                                | 4068.2(8)                                                                |
| Z                 | 4                                                                        | 4                                                                        | 4                                                                        |

|                                  |                              |                              |                              |
|----------------------------------|------------------------------|------------------------------|------------------------------|
| dcalcd., g cm <sup>-3</sup>      | 1.607                        | 1.612                        | 1.650                        |
| Final R indices<br>[I>2sigma(I)] | R1 = 0.0333, wR2 =<br>0.0696 | R1 = 0.0339, wR2 =<br>0.0717 | R1 = 0.0825, wR2 =<br>0.2319 |
| R indices                        | R1 = 0.0407, wR2 =<br>0.0737 | R1 = 0.0411, wR2 =<br>0.0756 | R1 = 0.0904, wR2 =<br>0.2492 |
| GOF                              | 1.134                        | 1.155                        | 1.179                        |
| CCDC number                      | 1537250                      | 1537558                      | 1545014                      |

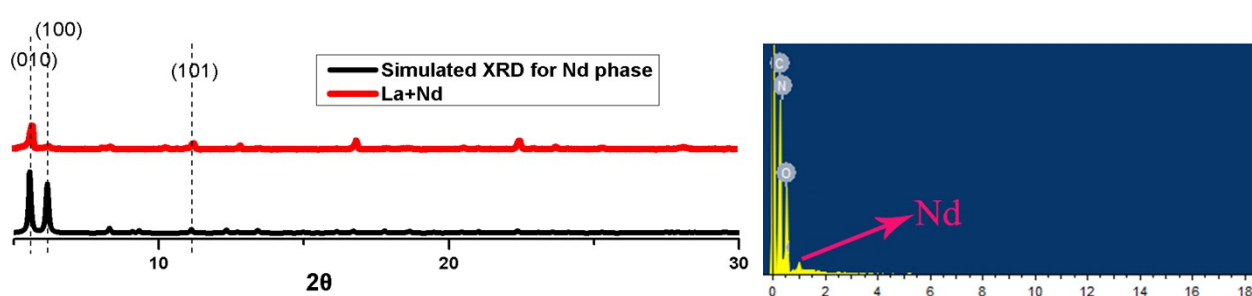

**Fig. S6** *Left:* The experimental XRD patterns for the resulted samples from a mixed La+Nd ions and the data simulated from single crystal data of Nd phase. *Right:* EDS results for the resulted samples from a mixed La+Nd ions.

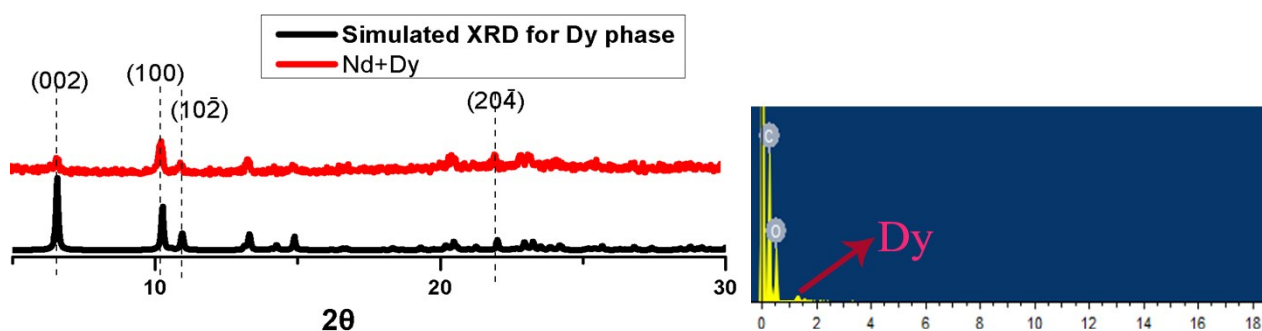

**Fig. S7** *Left:* The experimental XRD patterns for the resulted samples from a mixed Nd+Dy ions and the data simulated from single crystal data of Nd phase. *Right:* EDS results for the resulted samples from a mixed Nd+Dy ions.

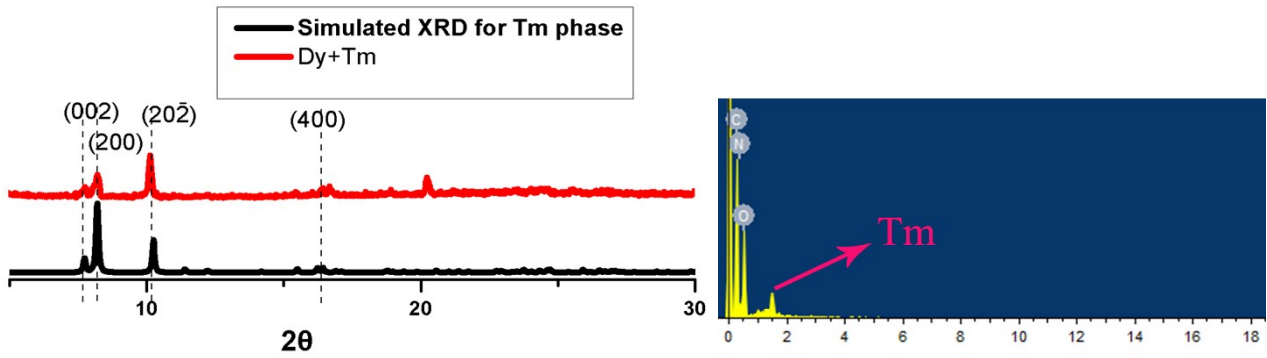

**Fig. S8** *Left:* The experimental XRD patterns for the resulted samples from a mixed Dy+Tm ions and the data simulated from single crystal data of Nd phase. *Right:* EDS results for the resulted samples from a mixed Dy+Tm ions.

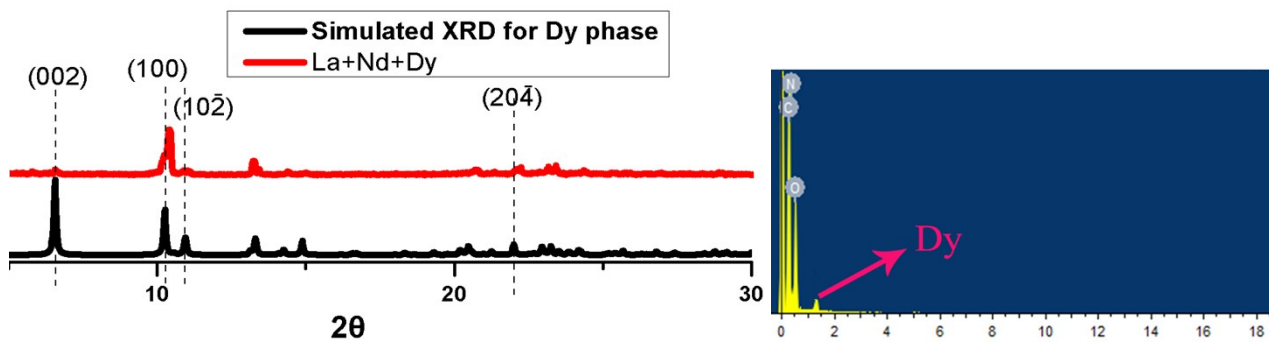

**Fig. S9** *Left:* The experimental XRD patterns for the resulted samples from a mixed La+Nd+Dy ions and the data simulated from single crystal data of Nd phase. *Right:* EDS results for the resulted samples from a mixed La+Nd+Dy ions.

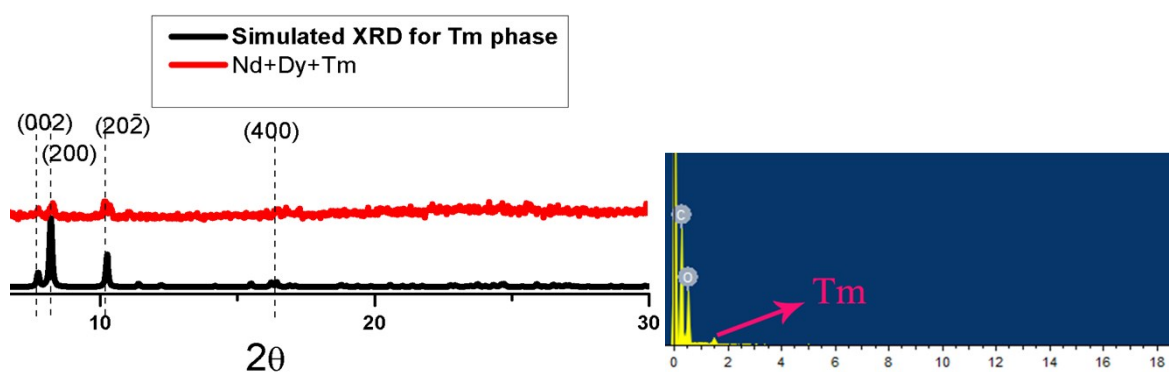

**Fig. S10** *Left:* The experimental XRD patterns for the resulted samples from a mixed Nd+Dy+Tm ions and the data simulated from single crystal data of Nd phase. *Right:* EDS results for the resulted samples from a mixed Nd+Dy+Tm ions.

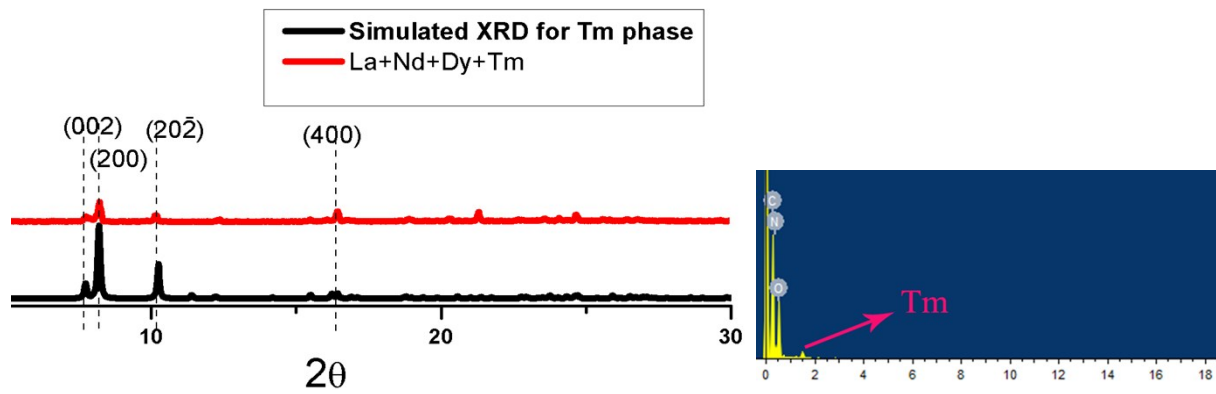

**Fig. S11** *Left:* The experimental XRD patterns for the resulted samples from a mixed La+Nd+Dy+Tm ions and the data simulated from single crystal data of Nd phase. *Right:* EDS results for the resulted samples from a mixed La+Nd+Dy+Tm ions.
